# Supplementary material
Source: PubMed Central journal article supplement (PMC2696562)
Supplement: NIHMS41999-supplement-01.pdf [file NIHMS41999-supplement-01.pdf]

# Supplemental Data

DS dp4 (*I*)

N.O. = not observed

N.A. = not assigned

| IRMPD    |         | EDD      |        | Assignment                                      |
|----------|---------|----------|--------|-------------------------------------------------|
| m/z      | S/N     | m/z      | S/N    |                                                 |
| 157.0142 | 335     | 157.0142 | 19.2   | B <sub>1</sub>                                  |
| 175.0248 | 1504    | 175.0246 | 115.8  | C <sub>1</sub>                                  |
| 185.437  | 756.2   | N.O.     |        | N.A.                                            |
| 189.1933 | 187.6   | N.O.     |        | N.A.                                            |
| 193.0354 | 322.9   | 193.0352 | 39.7   | N.A.                                            |
| N.O.     |         | 194.9273 | 79.1   | N.A.                                            |
| N.O.     |         | 198.9917 | 39.7   | N.A.                                            |
| 199.9952 | 88.7    | N.O.     |        | N.A.                                            |
| 202.0721 | 65.9    | N.O.     |        | N.A.                                            |
| 205.3711 | 68.1    | N.O.     |        | N.A.                                            |
| 210.3431 | 155.4   | N.O.     |        | N.A.                                            |
| 222.0078 | 55.3    | N.O.     |        | N.A.                                            |
| N.O.     |         | 236.0232 | 14.7   | N.A.                                            |
| N.O.     |         | 237.0312 | 20.9   | N.A.                                            |
| N.O.     |         | 238.0394 | 13.5   | N.A.                                            |
| N.O.     |         | 240.0743 | 19.8   | N.A.                                            |
| N.O.     |         | 254.0338 | 28.9   | N.A.                                            |
| 264.0184 | 52.8    | N.O.     |        | N.A.                                            |
| N.O.     |         | 266.0339 | 33.2   | N.A.                                            |
| N.O.     |         | 266.7317 | 21     | N.A.                                            |
| N.O.     |         | 272.992  | 47.4   | N.A.                                            |
| N.O.     |         | 280.0131 | 37.5   | N.A.                                            |
| N.O.     |         | 281.0212 | 40.6   | Z <sub>1</sub> '                                |
| 282.0288 | 5639.6  | 282.0288 | 1317   | Z <sub>1</sub>                                  |
| N.O.     |         | 298.0238 | 63.6   | Y <sub>1</sub> "                                |
| 300.0396 | 21983.1 | 300.0395 | 1208.3 | Y <sub>1</sub>                                  |
| N.O.     |         | 315.0265 | 73.8   | N.A.                                            |
| 316.543  | 726.8   | 316.5429 | 79.4   | N.A.                                            |
| 324.0397 | 927     | 324.0396 | 75.4   | N.A.                                            |
| N.O.     |         | 328.0343 | 250.4  | <sup>1,5</sup> X <sub>1</sub>                   |
| N.O.     |         | 337.3625 | 21.5   | N.A.                                            |
| 339.0718 | 114.9   | N.O.     |        | N.A.                                            |
| N.O.     |         | 341.0424 | 77.6   | N.A.                                            |
| 342.0502 | 383.3   | 342.0505 | 54.7   | <sup>0,2</sup> X <sub>1</sub>                   |
| N.O.     |         | 350.047  | 33.7   | N.A.                                            |
| 360.0937 | 211.2   | N.O.     |        | B <sub>2</sub> -SO <sub>3</sub>                 |
| 370.045  | 71.1    | N.O.     |        | N.A.                                            |
| 378.1043 | 615.6   | N.O.     |        | C <sub>2</sub> /Z <sub>2</sub> -SO <sub>3</sub> |

|          |         |          |         |                  |
|----------|---------|----------|---------|------------------|
| 379.0505 | 6650.3  | 379.05   | 641.4   | $Y_3^{2-}$       |
| 387.0823 | 34.2    | N.O.     |         | N.A.             |
| 391.0504 | 38.5    | N.O.     |         | N.A.             |
| 393.0479 | 37.7    | N.O.     |         | N.A.             |
| N.O.     |         | 396.061  | 20.2    | N.A.             |
| 396.1148 | 1233.4  | N.O.     |         | $Y_2-SO_3$       |
| N.O.     |         | 397.032  | 44      | N.A.             |
| N.O.     |         | 399.5518 | 24      | N.A.             |
| 400.0556 | 2428.2  | 400.0555 | 204.7   | $^{0,2}X_3^{2-}$ |
| 409.0774 | 60      | N.O.     |         | N.A.             |
| N.O.     |         | 412.0559 | 18.4    | N.A.             |
| N.O.     |         | 413.0635 | 28.6    | N.A.             |
| N.O.     |         | 414.0712 | 283.2   | $Z_2-CO_2$       |
| 416.0505 | 159.2   | N.O.     |         | N.A.             |
| 418.0825 | 181.7   | 418.0825 | 24.9    | N.A.             |
| N.O.     |         | 420.9988 | 18.5    | N.A.             |
| 427.0608 | 75.7    | N.O.     |         | N.A.             |
| 430.066  | 69.4    | 430.0659 | 36.9    | N.A.             |
| N.O.     |         | 439.0426 | 65.7    | $B_2'$           |
| 440.0503 | 2913.9  | 440.0503 | 349.9   | $B_2$            |
| 449.0551 | 84.3    | 449.0552 | 24.1    | N.A.             |
| N.O.     |         | 449.5591 | 48.2    | N.A.             |
| 458.0606 | 32749.9 | 458.0586 | 91780.8 | precursor ion    |
| 465.3044 | 127.2   | N.O.     |         | N.A.             |
| 474.1256 | 38.6    | N.O.     |         | N.A.             |
| N.O.     |         | 474.0559 | 87.2    | $Y_2''$          |
| 476.0716 | 3468.7  | 476.0718 | 467.6   | $Y_2$            |
| 492.1362 | 52.9    | N.O.     |         | N.A.             |
| 494.1157 | 37.5    | N.O.     |         | N.A.             |
| N.O.     |         | 495.0357 | 47      | N.A.             |
| 500.0716 | 3115.2  | 500.0713 | 102.1   | $^{2,4}A_3$      |
| N.O.     |         | 504.0667 | 114.8   | $^{1,5}X_2$      |
| 512.0719 | 44.7    | 512.0387 | 27.3    | N.A.             |
| 518.0827 | 320.7   | N.O.     |         | N.A.             |
| N.O.     |         | 520.0074 | 160.4   | N.A.             |
| N.O.     |         | 528.0666 | 102.4   | $^{3,5}A_3$      |
| 536.1254 | 567.8   | N.O.     |         | $B_3-SO_3$       |
| N.O.     |         | 538.0179 | 43.7    | N.A.             |
| 554.1363 | 450.3   | N.O.     |         | $C_3-SO_3$       |
| N.O.     |         | 556.0283 | 41.4    | N.A.             |
| N.O.     |         | 557.0676 | 10.9    | N.A.             |
| 572.0929 | 49.1    | N.O.     |         | N.A.             |
| 574.0722 | 398.3   | 574.0719 | 207     | $^{0,2}A_3$      |
| N.O.     |         | 588.0887 | 22.4    | N.A.             |
| N.O.     |         | 614.1273 | 136.5   | N.A.             |
| N.O.     |         | 615.0747 | 142.1   | $B_3'$           |
| N.O.     |         | 615.9074 | 34.8    | N.A.             |
| 616.0827 | 2872.1  | 616.0818 | 896.3   | $B_3$            |

|          |        |          |        |                                                                 |
|----------|--------|----------|--------|-----------------------------------------------------------------|
| N.O.     |        | 629.1141 | 152.9  | N.A.                                                            |
| N.O.     |        | 632.0775 | 113.2  | C <sub>3</sub> "                                                |
| N.O.     |        | 633.0847 | 148.4  | N.A.                                                            |
| 634.0931 | 1417.8 | 634.0931 | 2697.9 | C <sub>3</sub>                                                  |
| N.O.     |        | 643.13   | 48.1   | N.A.                                                            |
| N.O.     |        | 644.137  | 48.1   | N.A.                                                            |
| N.O.     |        | 645.1457 | 46.9   | N.A.                                                            |
| N.O.     |        | 659.1251 | 165.9  | Z <sub>3</sub> "-SO <sub>3</sub>                                |
| N.O.     |        | 661.1417 | 69     | Z <sub>3</sub> -SO <sub>3</sub>                                 |
| N.O.     |        | 674.1248 | 22.2   | N.A.                                                            |
| N.O.     |        | 677.1351 | 43.2   | Y <sub>3</sub> "-SO <sub>3</sub>                                |
| 679.1516 | 45.2   | 679.1517 | 45.8   | Y <sub>3</sub> -SO <sub>3</sub>                                 |
| N.O.     |        | 688.1035 | 197.1  | N.A.                                                            |
| N.O.     |        | 702.1432 | 217.9  | <sup>0,2</sup> X <sub>3</sub> -H <sub>2</sub> O-SO <sub>3</sub> |
| N.O.     |        | 712.0933 | 23.1   | N.A.                                                            |
| N.O.     |        | 714.0497 | 103.5  | N.A.                                                            |
| N.O.     |        | 715.0574 | 133    | N.A.                                                            |
| N.O.     |        | 718.1131 | 69.2   | N.A.                                                            |
| N.O.     |        | 720.1538 | 1057   | <sup>0,2</sup> X <sub>3</sub> -SO <sub>3</sub>                  |
| N.O.     |        | 782.1004 | 147    | <sup>0,2</sup> X <sub>3</sub> -H <sub>2</sub> O                 |
| N.O.     |        | 786.0715 | 24.4   | N.A.                                                            |
| N.O.     |        | 788.144  | 31.3   | N.A.                                                            |
| N.O.     |        | 790.1611 | 18.5   | N.A.                                                            |
| N.O.     |        | 791.1671 | 30.2   | N.A.                                                            |
| N.O.     |        | 792.1741 | 42.5   | N.A.                                                            |
| N.O.     |        | 800.1108 | 1147.4 | <sup>0,2</sup> X <sub>3</sub>                                   |
| N.O.     |        | 818.1543 | 111.1  | N.A.                                                            |
| N.O.     |        | 835.1581 | 44.2   | N.A.                                                            |
| N.O.     |        | 836.1653 | 210.2  | [M-2H-SO <sub>3</sub> ]-•                                       |
| N.O.     |        | 898.1126 | 53.8   | [M-2H-H <sub>2</sub> O]-•                                       |
| N.O.     |        | 916.1218 | 10.6   | [M-2H]-•                                                        |

## DS dp6 (2)

N.O. = not observed

N.A. = not assigned

| IRMPD    |        | EDD      |        |                                                 |
|----------|--------|----------|--------|-------------------------------------------------|
| m/z      | S/N    | m/z      | S/N    | Assignment                                      |
| 157.0142 | 376.3  | 157.0141 | 16.9   | B <sub>1</sub>                                  |
| N.O.     |        | 172.0014 | 17.2   | N.A.                                            |
| 175.0248 | 495.6  | 175.0248 | 74.8   | C <sub>1</sub>                                  |
| 180.9812 | 905.5  | N.O.     |        | N.A.                                            |
| N.O.     |        | 193.0355 | 29.9   | N.A.                                            |
| N.O.     |        | 194.9275 | 38.5   | N.A.                                            |
| N.O.     |        | 198.9918 | 35.9   | N.A.                                            |
| N.O.     |        | 235.0158 | 70.5   | N.A.                                            |
| N.O.     |        | 236.0237 | 56.7   | N.A.                                            |
| N.O.     |        | 237.0314 | 86.7   | N.A.                                            |
| N.O.     |        | 254.0342 | 22.2   | N.A.                                            |
| N.O.     |        | 255.9896 | 19     | N.A.                                            |
| N.O.     |        | 264.0186 | 20.2   | N.A.                                            |
| N.O.     |        | 266.0341 | 41.4   | N.A.                                            |
| N.O.     |        | 270.9769 | 63.6   | N.A.                                            |
| N.O.     |        | 280.0129 | 14.2   | N.A.                                            |
| N.O.     |        | 281.0213 | 197    | Z <sub>1</sub> '                                |
| 282.0288 | 3277.5 | 282.0292 | 1370.3 | Z <sub>1</sub>                                  |
| 290.088  | 188.7  | N.O.     |        | N.A.                                            |
| N.O.     |        | 298.0239 | 54.2   | Y <sub>1</sub> "                                |
| 300.0394 | 5448.6 | 300.0397 | 610.9  | Y <sub>1</sub>                                  |
| N.O.     |        | 310.0238 | 18.8   | N.A.                                            |
| N.O.     |        | 315.0264 | 19.3   | N.A.                                            |
| 318.083  | 243.8  | N.O.     |        | N.A.                                            |
| 324.0394 | 814.6  | 324.0397 | 39     | N.A.                                            |
| N.O.     |        | 328.0345 | 420.3  | <sup>1,5</sup> X <sub>1</sub>                   |
| 339.0717 | 68.2   | N.O.     |        | N.A.                                            |
| N.O.     |        | 341.0423 | 79.2   | N.A.                                            |
| 342.05   | 715.9  | 342.0516 | 15.2   | <sup>0,2</sup> X <sub>1</sub>                   |
| 349.0396 | 35.2   | N.O.     |        | N.A.                                            |
| N.O.     |        | 356.0299 | 19.3   | N.A.                                            |
| N.O.     |        | 357.0364 | 20.2   | N.A.                                            |
| 360.0936 | 151.1  | N.O.     |        | B <sub>2</sub> -SO <sub>3</sub>                 |
| 370.0449 | 307.2  | 370.0454 | 27.7   | Z <sub>3</sub> <sup>2-</sup>                    |
| 378.1041 | 1071   | N.O.     |        | C <sub>2</sub> /Z <sub>2</sub> -SO <sub>3</sub> |
| 379.0501 | 817.1  | 379.0505 | 226.3  | Y <sub>3</sub> <sup>2-</sup>                    |
| N.O.     |        | 386.0526 | 19.7   | N.A.                                            |
| 391.0502 | 69.8   | N.O.     |        | N.A.                                            |
| N.O.     |        | 393.0486 | 54.5   | <sup>1,5</sup> X <sub>3</sub> <sup>2-</sup>     |
| 396.1146 | 320.3  | N.O.     |        | N.A.                                            |
| 400.0556 | 60.7   | 400.0541 | 16.1   | <sup>0,2</sup> X <sub>3</sub> <sup>2-</sup>     |
| 405.3872 | 134.8  | 405.3881 | 77.5   | Y <sub>5</sub> <sup>3-</sup>                    |

|          |        |          |         |                                     |
|----------|--------|----------|---------|-------------------------------------|
| N.O.     |        | 407.5503 | 11.2    | $^{2,5}X_3^{2-}$                    |
| N.O.     |        | 414.0722 | 85.5    | $Z_2-CO_2$                          |
| 416.0504 | 93.9   | N.O.     |         | N.A.                                |
| 418.0826 | 113.7  | N.O.     |         | N.A.                                |
| 418.5838 | 56     | N.O.     |         | N.A.                                |
| 419.3909 | 110.8  | 419.3913 | 60.2    | $^{0,2}X_5^{3-}$                    |
| 427.0875 | 30.3   | N.O.     |         | N.A.                                |
| 430.066  | 150.5  | 430.0682 | 18.7    | N.A.                                |
| N.O.     |        | 431.4103 | 25.8    | N.A.                                |
| 431.7426 | 75.9   | N.O.     |         | N.A.                                |
| N.O.     |        | 436.0669 | 62.1    | $Z_4-CO_2^{2-}$ or $^{1,5}A_4^{2-}$ |
| N.O.     |        | 439.0434 | 27.3    | $B_2'$                              |
| 440.0503 | 504.5  | 440.0514 | 218.5   | $B_2$                               |
| N.O.     |        | 443.7214 | 20.4    | N.A.                                |
| 449.0555 | 91.7   | 449.0566 | 70.4    | $B_4^{2-}$                          |
| N.O.     |        | 452.0575 | 26.1    | $[M-3H-H_2O]^{3-}$                  |
| 458.0608 | 9902.9 | 458.06   | 46911.7 | precursor ion                       |
| N.O.     |        | 466.0576 | 11.4    | $Y_4^{n2-}$                         |
| 467.0664 | 19.5   | 467.0671 | 55.1    | $Y_4^{2-}$                          |
| N.O.     |        | 474.0563 | 68      | $Y_2''$                             |
| 476.0716 | 377.8  | 476.0722 | 841.9   | $Y_2$                               |
| 479.0661 | 52.4   | N.O.     |         | N.A.                                |
| N.O.     |        | 481.0637 | 34.3    | $^{1,5}X_4^{2-}$                    |
| N.O.     |        | 486.0559 | 19.6    | N.A.                                |
| 500.0715 | 761.4  | 500.0708 | 27.4    | $^{2,4}A_3$                         |
| N.O.     |        | 504.0667 | 65.4    | $^{1,5}X_2$                         |
| N.O.     |        | 512.0714 | 21.3    | N.A.                                |
| 518.1154 | 37.5   | N.O.     |         | N.A.                                |
| N.O.     |        | 520.0069 | 48.7    | N.A.                                |
| N.O.     |        | 521.01   | 10.6    | N.A.                                |
| N.O.     |        | 528.0669 | 173.6   | $^{3,5}A_3$                         |
| N.O.     |        | 530.5995 | 12.7    | N.A.                                |
| N.O.     |        | 536.0936 | 19.7    | $B_5^{i2-}$                         |
| 536.1255 | 110.9  |          |         | $B_3-SO_3$                          |
| 537.0719 | 229.7  | 537.0723 | 134     | $B_5^{2-}$                          |
| N.O.     |        | 543.5876 | 30.9    | N.A.                                |
| N.O.     |        | 545.0695 | 78      | $C_5^{n2-}$                         |
| N.O.     |        | 546.0775 | 84.6    | $C_5^{2-}$                          |
| N.O.     |        | 550.5955 | 27      | N.A.                                |
| 554.1362 | 663.6  | N.O.     |         | $C_3-SO_3$                          |
| N.O.     |        | 556.0283 | 40.9    | N.A.                                |
| N.O.     |        | 558.5926 | 47.3    | $Z_5''-SO_3^{2-}$                   |
| N.O.     |        | 559.5999 | 19.1    | $Z_5-SO_3^{2-}$                     |
| N.O.     |        | 567.598  | 15.9    | $Y_5''-SO_3^{2-}$                   |
| 568.6072 | 10.4   | 568.6058 | 75.8    | $Y_5-SO_3^{2-}$                     |
| N.O.     |        | 573.0821 | 135.7   | N.A.                                |
| 574.0718 | 33.7   | 574.0717 | 299.8   | $^{0,2}A_3$                         |
| N.O.     |        | 579.582  | 22.2    | N.A.                                |

|          |       |          |       |                                              |
|----------|-------|----------|-------|----------------------------------------------|
| 581.1833 | 25.8  | N.O.     |       | N.A.                                         |
| N.O.     |       | 587.0808 | 12.7  | N.A.                                         |
| N.O.     |       | 588.0853 | 17.3  | N.A.                                         |
| 589.611  | 36.9  | N.O.     |       | N.A.                                         |
| N.O.     |       | 589.1073 | 267   | $^{0,2}\text{X}_5\text{-SO}_3^{2-}$          |
| 598.0729 | 7.3   | N.O.     |       | N.A.                                         |
| 599.1933 | 24.1  | N.O.     |       | N.A.                                         |
| N.O.     |       | 614.1275 | 21    | N.A.                                         |
| N.O.     |       | 615.0746 | 107.6 | $\text{B}_3'$                                |
| 616.0825 | 492.5 | 616.0818 | 146.7 | $\text{B}_3$                                 |
| N.O.     |       | 623.1018 | 18.3  | N.A.                                         |
| N.O.     |       | 629.0835 | 57.2  | $^{0,2}\text{X}_5^{2-}$                      |
| N.O.     |       | 629.1158 | 54.9  | N.A.                                         |
| N.O.     |       | 632.0779 | 130.7 | $\text{C}_3''$                               |
| 634.0931 | 357.4 | 634.0933 | 487.6 | $\text{C}_3$                                 |
| N.O.     |       | 638.1074 | 35.4  | N.A.                                         |
| N.O.     |       | 642.1183 | 11.4  | N.A.                                         |
| N.O.     |       | 643.1304 | 21    | N.A.                                         |
| N.O.     |       | 644.137  | 32.8  | N.A.                                         |
| N.O.     |       | 646.6086 | 33.6  | $[\text{M-3H-SO}_3\text{H}]2\text{-}\bullet$ |
| N.O.     |       | 647.1121 | 57.8  | $[\text{M-3H-SO}_3]2\text{-}\bullet$         |
| N.O.     |       | 659.125  | 56.9  | $\text{Z}_3''\text{-SO}_3$                   |
| 661.1399 | 40.4  | 661.1404 | 56.1  | $\text{Z}_3\text{-SO}_3$                     |
| N.O.     |       | 677.1358 | 22.3  | $\text{Y}_3''\text{-SO}_3$                   |
| 679.1511 | 29.9  | 679.1516 | 112.6 | $\text{Y}_3\text{-SO}_3$                     |
| N.O.     |       | 683.0921 | 11.6  | N.A.                                         |
| N.O.     |       | 688.1041 | 21.3  | N.A.                                         |
| N.O.     |       | 689.1377 | 27.8  | N.A.                                         |
| N.O.     |       | 702.1437 | 160.2 | $^{0,2}\text{X}_3\text{-H}_2\text{O-SO}_3$   |
| 703.1506 | 34.4  | N.O.     |       | N.A.                                         |
| N.O.     |       | 707.1464 | 104.8 | $^{1,5}\text{X}_3\text{-SO}_3$               |
| N.O.     |       | 714.0498 | 28.6  | N.A.                                         |
| N.O.     |       | 720.154  | 207   | $^{0,2}\text{X}_3\text{-SO}_3$               |
| N.O.     |       | 741.0971 | 60.4  | $\text{Z}_3$                                 |
| 749.157  | 21.8  | N.O.     |       | N.A.                                         |
| 757.2145 | 21.3  | N.O.     |       | N.A.                                         |
| N.O.     |       | 759.1077 | 122.5 | $\text{Y}_3$                                 |
| N.O.     |       | 769.0909 | 26.5  | N.A.                                         |
| N.O.     |       | 775.1714 | 15.5  | N.A.                                         |
| N.O.     |       | 782.1004 | 551.5 | $^{0,2}\text{X}_3\text{-H}_2\text{O}$        |
| N.O.     |       | 787.1024 | 149.2 | $^{1,5}\text{X}_3$                           |
| N.O.     |       | 792.1709 | 10.1  | N.A.                                         |
| N.O.     |       | 800.1107 | 222.5 | $^{0,2}\text{X}_3$                           |
| N.O.     |       | 818.1525 | 28.7  | $\text{B}_4'\text{-SO}_3$                    |
| 819.1613 | 40.5  | 819.1605 | 105.8 | $\text{B}_4\text{-SO}_3$                     |
| N.O.     |       | 820.2789 | 86.8  | N.A.                                         |
| N.O.     |       | 835.1568 | 146.5 | $\text{C}_4''/\text{Z}_4''\text{-SO}_3$      |
| 837.1716 | 24.7  | 837.1725 | 99.3  | $\text{C}_4/\text{Z}_4\text{-SO}_3$          |

|      |           |      |                  |
|------|-----------|------|------------------|
| N.O. | 855.1854  | 36.7 | $Y_4-SO_3$       |
| N.O. | 873.1388  | 27   | $Z_4-CO_2$       |
| N.O. | 883.1757  | 23.6 | $^{1,5}X_4-SO_3$ |
| N.O. | 898.1133  | 24.2 | $B_4'$           |
| N.O. | 899.1176  | 235  | $B_4$            |
| N.O. | 907.1765  | 83.3 | $^{3,5}A_5-SO_3$ |
| N.O. | 915.1119  | 54.7 | $C_4''/Z_4''$    |
| N.O. | 917.1266  | 37.9 | $C_4/Z_4$        |
| N.O. | 935.1356  | 12.4 | $Y_4$            |
| N.O. | 945.1243  | 11.5 | N.A.             |
| N.O. | 953.181   | 28.8 | $^{0,2}A_5-SO_3$ |
| N.O. | 963.129   | 17.9 | $^{1,5}X_4$      |
| N.O. | 987.1329  | 54.8 | $^{3,5}A_5$      |
| N.O. | 993.2397  | 16.3 | N.A.             |
| N.O. | 994.1772  | 15.8 | $B_5'-SO_3$      |
| N.O. | 995.1882  | 17.1 | $B_5-SO_3$       |
| N.O. | 1011.1828 | 14.8 | $C_5''-SO_3$     |
| N.O. | 1013.2033 | 151  | $C_5-SO_3$       |
| N.O. | 1022.2412 | 15.1 | N.A.             |
| N.O. | 1033.1433 | 18.6 | $^{0,2}A_5$      |
| N.O. | 1038.2342 | 15.7 | N.A.             |
| N.O. | 1073.1961 | 33.2 | N.A.             |
| N.O. | 1098.2605 | 14.2 | N.A.             |

# DS dp8 (3)

N.O. = not observed

N.A. = not assigned

| IRMPD    |        | EDD      |        | Assignment                                                    |
|----------|--------|----------|--------|---------------------------------------------------------------|
| m/z      | S/N    | m/z      | S/N    |                                                               |
| 157.0141 | 625.6  | 157.0142 | 131.4  | B <sub>1</sub>                                                |
| 175.0247 | 812.1  | 175.0248 | 285.7  | C <sub>1</sub>                                                |
| 193.0353 | 671    | N.O.     |        | N.A.                                                          |
| 196.0615 | 28.4   | N.O.     |        | N.A.                                                          |
| N.O.     |        | 196.9438 | 1349.3 | N.A.                                                          |
| 198.9918 | 977.9  | 198.9918 | 142.6  | N.A.                                                          |
| N.O.     |        | 201.237  | 65.2   | N.A.                                                          |
| 202.0721 | 218.8  | N.O.     |        | N.A.                                                          |
| N.O.     |        | 229.0309 | 84.8   | N.A.                                                          |
| N.O.     |        | 236.0235 | 64.3   | N.A.                                                          |
| N.O.     |        | 266.0341 | 79.6   | N.A.                                                          |
| N.O.     |        | 270.9767 | 84.7   | N.A.                                                          |
| N.O.     |        | 281.0212 | 146.7  | Z <sub>1</sub> '                                              |
| 282.0292 | 5351.5 | 282.029  | 2390.2 | Z <sub>1</sub>                                                |
| N.O.     |        | 298.0239 | 99.5   | Y <sub>1</sub> "                                              |
| 300.0399 | 8346.8 | 300.0396 | 1612.5 | Y <sub>1</sub>                                                |
| 318.0838 | 250.6  | N.O.     |        | N.A.                                                          |
| 324.0402 | 1035.3 | 324.0397 | 140.1  | N.A.                                                          |
| N.O.     |        | 328.0345 | 362.2  | <sup>1,5</sup> X <sub>1</sub>                                 |
| 330.0673 | 215.2  | N.O.     |        | Z <sub>3</sub> -SO <sub>3</sub> <sup>2-</sup>                 |
| 339.0726 | 122.4  | N.O.     |        | Y <sub>3</sub> -SO <sub>3</sub> <sup>2-</sup>                 |
| 342.0509 | 485.4  | 342.0503 | 73.1   | <sup>0,2</sup> X <sub>1</sub>                                 |
| 360.0946 | 262.6  | 360.0937 | 22.8   | B <sub>2</sub> -SO <sub>3</sub>                               |
| 370.0459 | 2225.4 | 370.0451 | 278.1  | Z <sub>3</sub> <sup>2-</sup>                                  |
| 378.1053 | 1544.6 | 378.1044 | 161    | C <sub>2</sub> /Z <sub>2</sub> -SO <sub>3</sub>               |
| 379.0513 | 1768.8 | 379.0504 | 511    | Y <sub>3</sub> <sup>2-</sup>                                  |
| 391.0514 | 152.6  | N.O.     |        | N.A.                                                          |
| N.O.     |        | 393.0479 | 124.3  | <sup>1,5</sup> X <sub>3</sub> <sup>2-</sup>                   |
| 396.116  | 465.5  | 396.1151 | 66.3   | Y <sub>2</sub> -SO <sub>3</sub>                               |
| N.O.     |        | 399.3838 | 56     | Z <sub>5</sub> <sup>3-</sup>                                  |
| 405.3884 | 1646.4 | 405.3873 | 504.2  | Y <sub>5</sub> <sup>3-</sup>                                  |
| 409.0788 | 104.6  | N.O.     |        | N.A.                                                          |
| 413.3886 | 182    | N.O.     |        | N.A.                                                          |
| N.O.     |        | 414.0714 | 99.2   | Z <sub>7</sub>                                                |
| N.O.     |        | 414.719  | 95.8   | <sup>1,5</sup> X <sub>5</sub> <sup>3-</sup>                   |
| 416.052  | 72.2   | N.O.     |        | N.A.                                                          |
| 418.0841 | 459.4  | 418.0829 | 50.8   | C <sub>4</sub> /Z <sub>4</sub> -SO <sub>3</sub> <sup>2-</sup> |
| 418.5569 | 378.6  | 418.5557 | 129    | Y <sub>7</sub> <sup>4-</sup>                                  |
| N.O.     |        | 419.0561 | 201.5  | N.A.                                                          |
| 425.4065 | 41.5   | N.O.     |        | N.A.                                                          |
| 427.0896 | 47.6   | N.O.     |        | N.A.                                                          |
| 429.0597 | 197.5  | 429.0583 | 79.9   | <sup>0,2</sup> X <sub>7</sub> <sup>4-</sup>                   |

|          |         |          |         |                                                            |
|----------|---------|----------|---------|------------------------------------------------------------|
| N.O.     |         | 429.5589 | 119.1   | N.A.                                                       |
| 431.4103 | 125.9   | N.O.     |         | N.A.                                                       |
| N.O.     |         | 436.0664 | 94.5    | ${}^{1,5}\text{A}_4^{2-}$ or $\text{Z}_4\text{-CO}_2^{2-}$ |
| 437.4137 | 63.2    | N.O.     |         | N.A.                                                       |
| 438.0733 | 178     | 438.0718 | 102.8   | $[\text{M-4H-SO}_3]^{4-}$                                  |
| N.O.     |         | 438.5726 | 196.2   | N.A.                                                       |
| N.O.     |         | 439.0428 | 32.3    | $\text{B}_2'$                                              |
| 440.0522 | 538     | 440.0507 | 357.1   | $\text{B}_2$                                               |
| N.O.     |         | 443.3979 | 67.3    | ${}^{1,5}\text{A}_6^{3-}$ or $\text{Z}_6\text{-CO}_2^{3-}$ |
| N.O.     |         | 447.3063 | 156.6   | N.A.                                                       |
| 449.0575 | 167.4   | 449.0558 | 156.4   | $\text{B}_4^{2-}$                                          |
| 452.0593 | 427.6   | 452.0575 | 171.6   | $\text{B}_6^{3-}$                                          |
| N.O.     |         | 452.725  | 123.1   | N.A.                                                       |
| 458.0625 | 15910.5 | 458.0603 | 47619.5 | precursor ion                                              |
| N.O.     |         | 464.0647 | 14.2    | $\text{Y}_6^{3-}$                                          |
| N.O.     |         | 466.0584 | 15.2    | $\text{Y}_4^{n2-}$                                         |
| N.O.     |         | 467.0668 | 188     | $\text{Y}_4^{2-}$                                          |
| 472.0665 | 205.4   | N.O.     |         | N.A.                                                       |
| N.O.     |         | 474.056  | 227.8   | $\text{Y}_2''$                                             |
| 476.0738 | 1364.8  | 476.0719 | 1518.4  | $\text{Y}_2$                                               |
| 479.0683 | 106.1   | N.O.     |         | N.A.                                                       |
| N.O.     |         | 481.0642 | 25.8    | ${}^{1,5}\text{X}_4^{2-}$                                  |
| 484.0847 | 72.2    | N.O.     |         | N.A.                                                       |
| N.O.     |         | 493.064  | 274.6   | ${}^{3,5}\text{A}_5^{2-}$                                  |
| 497.0958 | 114     | N.O.     |         | $\text{B}_5\text{-SO}_3$                                   |
| 500.0741 | 1154.8  | 500.0719 | 104.6   | ${}^{2,4}\text{A}_3$                                       |
| N.O.     |         | 504.067  | 61.5    | ${}^{1,5}\text{X}_2$                                       |
| 506.1013 | 46.5    | N.O.     |         | $\text{C}_5\text{-SO}_3^{2-}$                              |
| 510.7373 | 1021.3  | 510.7351 | 217.8   | $\text{B}_7^{3-}$                                          |
| N.O.     |         | 511.4025 | 187.3   | N.A.                                                       |
| N.O.     |         | 516.0667 | 321.6   | ${}^{0,2}\text{A}_5^{2-}$                                  |
| N.O.     |         | 516.7384 | 70.8    | $\text{C}_7^{3-}$                                          |
| 518.118  | 73.3    | N.O.     |         | N.A.                                                       |
| N.O.     |         | 525.7545 | 18.6    | $\text{Z}_7\text{-SO}_3^{3-}$                              |
| N.O.     |         | 528.067  | 86.2    | ${}^{3,5}\text{A}_3$                                       |
| 531.7605 | 40.7    | 531.7576 | 77      | $\text{Y}_7\text{-SO}_3^{3-}$                              |
| 536.1287 | 275.6   | 536.1265 | 35.7    | $\text{B}_3\text{-SO}_3$                                   |
| N.O.     |         | 536.5681 | 86.2    | $\text{B}_5^{i2-}$                                         |
| 537.0749 | 399.8   | 537.0718 | 176.5   | $\text{B}_5^{2-}$                                          |
| N.O.     |         | 545.0695 | 177.4   | $\text{C}_5^{n2-}$                                         |
| N.O.     |         | 545.4253 | 170.2   | ${}^{0,2}\text{X}_7\text{-SO}_3^{3-}$                      |
| 545.7638 | 159.1   | N.O.     |         | N.A.                                                       |
| N.O.     |         | 546.0774 | 246.7   | $\text{C}_5^{2-}$                                          |
| N.O.     |         | 552.4065 | 12.4    | $\text{Z}_7^{3-}$                                          |
| N.O.     |         | 553.0777 | 24      | N.A.                                                       |
| 554.1396 | 892.5   | 554.1369 | 74.6    | $\text{C}_3\text{-SO}_3$                                   |
| N.O.     |         | 558.4104 | 33.8    | $\text{Y}_7^{3-}$                                          |
| 559.6038 | 48.4    | 559.601  | 33.9    | $\text{Z}_5\text{-SO}_3$                                   |

|          |       |          |       |                         |
|----------|-------|----------|-------|-------------------------|
| 568.6092 | 31.6  | 568.6064 | 84    | $Y_5-SO_3^{2-}$         |
| 572.0962 | 35.3  | 572.0773 | 301.2 | $^{0,2}X_7^{3-}$        |
| 574.0753 | 14    | 574.0723 | 180.3 | $^{0,2}A_3$             |
| N.O.     |       | 580.1027 | 54.6  | N.A.                    |
| 581.1871 | 71.8  | N.O.     |       | N.A.                    |
| N.O.     |       | 582.6033 | 42.3  | $^{1,5}X_5-SO_3^{2-}$   |
| N.O.     |       | 584.0946 | 53.6  | $[M-4H-SO_3]^{3-}$      |
| 584.4358 | 17.9  | N.O.     |       | N.A.                    |
| N.O.     |       | 589.1081 | 63.1  | $^{0,2}X_5-SO_3^{2-}$   |
| N.O.     |       | 592.083  | 41.3  | N.A.                    |
| 599.1982 | 52.3  | 599.5794 | 35.5  | $Z_5^{2-}$              |
| N.O.     |       | 608.5841 | 29.2  | $Y_5^{2-}$              |
| N.O.     |       | 610.7486 | 13.6  | $[M-4H]^{3-}$           |
| N.O.     |       | 615.0749 | 89.7  | $B_3'$                  |
| 616.0869 | 682.7 | 616.0831 | 243.2 | $B_3$                   |
| N.O.     |       | 620.0807 | 216.4 | N.A.                    |
| N.O.     |       | 625.6221 | 26.5  | N.A.                    |
| N.O.     |       | 629.0854 | 20.6  | $^{0,2}X_5^{2-}$        |
| N.O.     |       | 629.1166 | 29.8  | N.A.                    |
| N.O.     |       | 632.078  | 52.7  | $C_3''$                 |
| 634.0977 | 473.1 | 634.0936 | 208.1 | $C_3$                   |
| N.O.     |       | 638.1076 | 14.7  | $B_6'-SO_3^{2-}$        |
| 638.6156 | 49.7  | 638.6111 | 52.2  | $B_6-SO_3$              |
| N.O.     |       | 644.138  | 32.4  | N.A.                    |
| N.O.     |       | 646.6091 | 67.6  | $C_6''/Z_6''-SO_3^{2-}$ |
| 647.6219 | 23.7  | 647.6164 | 69.9  | $C_6/Z_6-SO_3^{2-}$     |
| N.O.     |       | 652.1043 | 78.5  | N.A.                    |
| N.O.     |       | 656.6215 | 39.5  | $Y_6-SO_3$              |
| N.O.     |       | 659.1248 | 20.3  | $Z_3''-SO_3$            |
| 661.1451 | 116.7 | 661.1409 | 81.3  | $Z_3-SO_3$              |
| 668.6258 | 22.4  | N.O.     |       | N.A.                    |
| N.O.     |       | 677.1371 | 16.9  | $Y_3''-SO_3$            |
| N.O.     |       | 678.084  | 8.3   | $B_6'^{2-}$             |
| N.O.     |       | 678.5895 | 17.8  | $B_6^{2-}$              |
| 679.1565 | 53.3  | 679.1514 | 65.9  | $Y_3-SO_3$              |
| N.O.     |       | 687.5959 | 9.5   | $C_6/Z_6^{2-}$          |
| N.O.     |       | 689.1363 | 45.7  | N.A.                    |
| 695.3684 | 12.8  | N.O.     |       | N.A.                    |
| N.O.     |       | 702.1435 | 76.2  | $^{0,2}X_3-H_2O-SO_3$   |
| 703.1566 | 49.8  | N.O.     |       | N.A.                    |
| N.O.     |       | 707.1462 | 62.6  | $^{1,5}X_3-SO_3$        |
| N.O.     |       | 720.1537 | 51.5  | $^{0,2}X_3-SO_3$        |
| N.O.     |       | 741.0978 | 183.7 | $Z_3$                   |
| 757.2225 | 89.7  | N.O.     |       | N.A.                    |
| N.O.     |       | 759.1083 | 89.8  | $Y_3$                   |
| N.O.     |       | 769.0925 | 109.3 | N.A.                    |
| N.O.     |       | 778.1596 | 27.9  | N.A.                    |
| N.O.     |       | 782.1005 | 273.4 | $^{0,2}X_3-H_2O$        |

|          |      |           |       |                    |
|----------|------|-----------|-------|--------------------|
| N.O.     |      | 787.1033  | 117.4 | $^{1,5}X_3$        |
| N.O.     |      | 793.1851  | 22.2  | N.A.               |
| N.O.     |      | 798.0952  | 37.9  | N.A.               |
| N.O.     |      | 800.1111  | 105.7 | $^{0,2}X_3$        |
| N.O.     |      | 818.1555  | 12.3  | $B_4'-SO_3$        |
| 819.1705 | 47.5 | 819.1627  | 253.8 | $B_4-SO_3$         |
| N.O.     |      | 835.1574  | 53.5  | $C_4''/Z_4''-SO_3$ |
| 837.1805 | 66.5 | 837.1729  | 94.5  | $C_4/Z_4-SO_3$     |
| N.O.     |      | 855.1292  | 57    | $Y_4-SO_3$         |
| 879.1935 | 40.7 | N.O.      |       | N.A.               |
| N.O.     |      | 898.1131  | 24.2  | $B_4'$             |
| N.O.     |      | 899.1193  | 616.1 | $B_4$              |
| N.O.     |      | 915.1143  | 41.7  | $C_4''/Z_4''$      |
| N.O.     |      | 917.1301  | 114.2 | $C_4/Z_4$          |
| N.O.     |      | 935.1416  | 35.6  | $Y_4$              |
| N.O.     |      | 945.1244  | 32.4  | N.A.               |
| N.O.     |      | 1013.2051 | 47.7  | $C_5-SO_3$         |
| N.O.     |      | 1055.1851 | 37.8  | N.A.               |

# DS dp10 (4)

N.O. = not observed

N.A. = not assigned

| IRMPD    |        | EDD      |        | Assignment     |
|----------|--------|----------|--------|----------------|
| m/z      | S/N    | m/z      | S/N    |                |
| 157.0137 | 267    | 157.0142 | 59.2   | B1             |
| 175.0242 | 246.1  | 175.0248 | 93.5   | C1             |
| 180.9807 | 436.9  | N.O.     |        | N.A.           |
| 182.0657 | 133.6  | N.O.     |        | N.A.           |
| 184.061  | 65.7   | N.O.     |        | N.A.           |
| 185.3514 | 307.7  | N.O.     |        | N.A.           |
| 189.193  | 140.8  | N.O.     |        | N.A.           |
| 193.0348 | 310    | 193.0353 | 66.8   | N.A.           |
| 196.9435 | 3185.1 | 196.944  | 438.9  | N.A.           |
| 198.9912 | 861.2  | 198.9918 | 57.3   | N.A.           |
| N.O.     |        | 201.2372 | 34.7   | N.A.           |
| 202.0715 | 166.5  | 202.0721 | 23.3   | N.A.           |
| N.O.     |        | 236.0234 | 48.2   | N.A.           |
| N.O.     |        | 237.532  | 42.7   | N.A.           |
| N.O.     |        | 266.034  | 33.9   | N.A.           |
| N.O.     |        | 280.0133 | 16.2   | N.A.           |
| N.O.     |        | 281.0211 | 66.1   | Z1'            |
| 282.0284 | 1747.8 | 282.0289 | 1324.9 | Z1             |
| N.O.     |        | 298.0237 | 38.2   | Y1"            |
| 300.039  | 1425.9 | 300.0395 | 596.9  | Y1             |
| N.O.     |        | 310.024  | 25.7   | N.A.           |
| 318.0826 | 80.3   | N.O.     |        | N.A.           |
| 324.039  | 236.9  | 324.0395 | 53.5   | N.A.           |
| N.O.     |        | 328.0344 | 180.3  | 1,5X1          |
| 330.0662 | 39.8   | N.O.     |        | N.A.           |
| N.O.     |        | 341.0417 | 22.8   | N.A.           |
| 342.0496 | 210.7  | 342.0502 | 27.9   | 0,2X1          |
| 360.0932 | 64.3   | 360.0937 | 22.8   | B2-SO3         |
| 370.0446 | 594.2  | 370.045  | 286    | Z32-           |
| 378.1039 | 448    | 378.1042 | 92.4   | C2/Z2-SO3      |
| 379.0499 | 298.2  | 379.0502 | 264.5  | Y32-           |
| N.O.     |        | 393.0478 | 124.2  | 1,5X32-        |
| 396.1144 | 122.9  | 396.1151 | 32.1   | Y2-SO3         |
| N.O.     |        | 398.5663 | 21.3   | N.A.           |
| 399.3832 | 346.7  | 399.3835 | 170    | Z53-           |
| 405.3868 | 497.9  | 405.3872 | 330.6  | Y53-           |
| N.O.     |        | 412.0555 | 25.7   | N.A.           |
| 414.0526 | 82.9   | 414.0527 | 56.2   | Z74- or Z2-CO2 |
| N.O.     |        | 414.7185 | 46.5   | 1,5X53-        |
| N.O.     |        | 418.0826 | 38     | C4/Z4-SO32-    |
| 418.5552 | 753.5  | 418.5554 | 478    | Y74-           |
| N.O.     |        | 424.555  | 15.6   | N.A.           |

|          |         |          |         |                     |
|----------|---------|----------|---------|---------------------|
| N.O.     |         | 425.5541 | 47.5    | 1,5X74-             |
| 426.4561 | 157.3   | 426.4565 | 113.5   | 2,4A105-            |
| 426.6574 | 27      | N.O.     |         | N.A.                |
| N.O.     |         | 429.058  | 23.5    | 0,2X74-             |
| 430.0659 | 50.4    | N.O.     |         | N.A.                |
| N.O.     |         | 431.4084 | 22.1    | N.A.                |
| 434.8582 | 59      | 434.8582 | 47.8    | 0,2X95-             |
| N.O.     |         | 436.0661 | 44.4    | 1,5A42- or Z4-CO22- |
| 438.0713 | 53.4    | 438.0718 | 48.1    | N.A.                |
| 440.0503 | 110.9   | 440.0505 | 187.4   | B2                  |
| 442.0691 | 148.3   | 442.0693 | 162.7   | [M-5H-SO3]5-        |
| N.O.     |         | 443.3974 | 37.5    | 1,5A63- or Z6-CO23- |
| N.O.     |         | 447.0641 | 23.9    | N.A.                |
| N.O.     |         | 448.5516 | 20.9    | B4'2-               |
| 449.0553 | 37      | 449.055  | 77.1    | B42-                |
| N.O.     |         | 449.4565 | 73.7    | N.A.                |
| N.O.     |         | 449.6578 | 114.3   | N.A.                |
| 452.0574 | 103.2   | 452.0575 | 92.3    | B63-                |
| 453.558  | 380.8   | 453.5581 | 222.8   | B74-                |
| 458.0605 | 27101.9 | 458.0602 | 34299.1 | precursor ion       |
| N.O.     |         | 464.0643 | 37.7    | Y63-                |
| N.O.     |         | 466.0587 | 29      | Y4"2-               |
| N.O.     |         | 467.0665 | 205.1   | Y42-                |
| N.O.     |         | 472.0649 | 10      | N.A.                |
| N.O.     |         | 474.056  | 153.7   | Y2"                 |
| 476.0717 | 261     | 476.0717 | 893.8   | Y2                  |
| N.O.     |         | 481.3957 | 26      | N.A.                |
| N.O.     |         | 486.0554 | 17.5    | N.A.                |
| N.O.     |         | 493.0639 | 56.2    | 3,5A52-             |
| N.O.     |         | 496.7314 | 45.7    | 2,5X63-             |
| N.O.     |         | 497.0655 | 34.6    | B5-SO32-            |
| 497.5662 | 175.5   | 497.5659 | 106.2   | B94-                |
| 500.0718 | 168.7   | 500.0718 | 58.1    | 2,4A3               |
| N.O.     |         | 502.0685 | 57.2    | C94-                |
| N.O.     |         | 504.0664 | 29.2    | 1,5X2               |
| N.O.     |         | 509.3342 | 19.8    | N.A.                |
| N.O.     |         | 510.3986 | 35.5    | B7'3-               |
| 510.735  | 161.4   | 510.7344 | 109.6   | B73-                |
| N.O.     |         | 513.3333 | 31.1    | Y9-SO34-            |
| N.O.     |         | 516.0665 | 285.8   | 0,2A52-             |
| N.O.     |         | 516.7382 | 23.4    | C73-                |
| N.O.     |         | 518.8209 | 14.8    | N.A.                |
| N.O.     |         | 523.5841 | 42.6    | 0,2X9-SO34-         |
| 523.8359 | 102.5   | 523.8354 | 77.7    | N.A.                |
| N.O.     |         | 525.7537 | 15      | Z7-SO33-            |
| N.O.     |         | 528.0665 | 17      | 3,5A3               |
| N.O.     |         | 529.0707 | 16.4    | Z94-                |
| N.O.     |         | 531.7567 | 47.9    | Y7-SO3              |

|                  |          |       |               |
|------------------|----------|-------|---------------|
| N.O.             | 533.3214 | 14.7  | Y94-          |
| 536.1263   57.5  | 536.1255 | 25.7  | B3-SO3        |
| N.O.             | 536.5679 | 58.5  | B5'2-         |
| 537.0723   110.1 | 537.071  | 100.1 | B52-          |
| N.O.             | 540.8333 | 49.5  | N.A.          |
| N.O.             | 543.5728 | 123.9 | 0,2X94-       |
| N.O.             | 543.8238 | 186.4 | N.A.          |
| N.O.             | 545.0691 | 31.9  | C5"2-         |
| N.O.             | 545.4247 | 16.8  | 0,2X7-SO33-   |
| N.O.             | 546.0772 | 117.5 | C52-          |
| N.O.             | 548.3374 | 17.7  | N.A.          |
| N.O.             | 550.7563 | 16    | N.A.          |
| N.O.             | 552.5861 | 37.7  | [M-5H-SO3]4-• |
| 554.1368   227.9 | 554.1368 | 51.1  | C3-SO3        |
| N.O.             | 558.4097 | 41.9  | Y73-          |
| N.O.             | 559.6008 | 25.7  | Z5-SO3        |
| N.O.             | 561.5759 | 11.5  | [M-5H-CO2]4-• |
| N.O.             | 566.0735 | 19.6  | N.A.          |
| N.O.             | 568.6055 | 28.2  | N.A.          |
| N.O.             | 572.077  | 37.4  | 0,2X73-       |
| N.O.             | 572.576  | 27.2  | [M-5H]4-•     |
| N.O.             | 572.8264 | 58.1  | N.A.          |
| N.O.             | 574.0721 | 52.7  | 0,2A3         |
| N.O.             | 577.4091 | 23.2  | N.A.          |
| 578.4286   35    | 578.4276 | 32.4  | B8-SO33-      |
| N.O.             | 580.1035 | 11.7  | N.A.          |
| N.O.             | 582.6026 | 11.5  | N.A.          |
| N.O.             | 583.7594 | 26.6  | C8"/Z8"-SO33- |
| N.O.             | 584.0934 | 29.9  | N.A.          |
| N.O.             | 584.4307 | 39.3  | C8/Z8-SO33-   |
| N.O.             | 589.1088 | 18.9  | 0,2X5-SO32-   |
| N.O.             | 590.4341 | 12.1  | N.A.          |
| N.O.             | 592.0827 | 45    | N.A.          |
| N.O.             | 596.4213 | 17.8  | N.A.          |
| N.O.             | 599.5792 | 54    | Z52-          |
| N.O.             | 605.0944 | 18.9  | B83-          |
| N.O.             | 608.5829 | 20.9  | Y52-          |
| N.O.             | 610.4118 | 12.4  | C8"/Z8"3-     |
| N.O.             | 611.0812 | 23.7  | C8/Z83-       |
| N.O.             | 615.0751 | 42.8  | B3'           |
| 616.0836   315   | 616.0826 | 160   | B3            |
| N.O.             | 620.0799 | 41.3  | N.A.          |
| N.O.             | 628.0773 | 26.6  | N.A.          |
| N.O.             | 629.0857 | 12.9  | 0,2X52-       |
| N.O.             | 629.1144 | 15.9  | N.A.          |
| N.O.             | 632.0766 | 15.7  | C3"           |
| 634.0944   139.3 | 634.0933 | 107.8 | C3            |
| N.O.             | 638.6112 | 64.6  | B6-SO32-      |

|          |      |           |       |               |
|----------|------|-----------|-------|---------------|
| N.O.     |      | 646.6086  | 23.6  | C6"/Z6"-SO3   |
| N.O.     |      | 646.7918  | 13.4  | N.A.          |
| N.O.     |      | 647.6163  | 37.1  | C6/Z6-SO3     |
| N.O.     |      | 650.0884  | 19.4  | N.A.          |
| N.O.     |      | 652.1039  | 51.8  | N.A.          |
| N.O.     |      | 656.6202  | 26.7  | Y6-SO3        |
| 661.1425 | 35.1 | 661.1409  | 36.6  | Z3-SO3        |
| N.O.     |      | 678.5897  | 86.3  | B62-          |
| N.O.     |      | 679.1514  | 17.4  | Y3-SO3        |
| N.O.     |      | 687.5941  | 19.3  | C6/Z62-       |
| N.O.     |      | 689.1388  | 14.8  | N.A.          |
| N.O.     |      | 695.2686  | 11.4  | N.A.          |
| N.O.     |      | 696.5999  | 10    | Y6            |
| N.O.     |      | 702.1431  | 22.1  | 0,2X3-H2O-SO3 |
| N.O.     |      | 706.1162  | 13.3  | N.A.          |
| N.O.     |      | 720.1553  | 13.4  | 0,2X3-SO3     |
| N.O.     |      | 741.0977  | 116.5 | Z3            |
| 757.218  | 40.1 | 757.2226  | 10.5  | N.A.          |
| N.O.     |      | 759.1083  | 24.6  | Y3            |
| N.O.     |      | 769.0929  | 48.3  | N.A.          |
| N.O.     |      | 782.0998  | 149   | 0,2X3-H2O     |
| N.O.     |      | 787.1022  | 25    | 1,5X3         |
| N.O.     |      | 798.0935  | 20.2  | N.A.          |
| N.O.     |      | 800.1131  | 23.2  | 0,2X3         |
| N.O.     |      | 819.1617  | 90.9  | B4-SO3        |
| 837.1762 | 32.8 | 837.1728  | 53    | C4/Z4-SO3     |
| N.O.     |      | 855.1302  | 33.8  | Y4-SO3        |
| N.O.     |      | 898.1143  | 14    | B4'           |
| N.O.     |      | 899.119   | 358.6 | B4            |
| N.O.     |      | 915.1163  | 12.8  | C4"/Z4"       |
| N.O.     |      | 917.1296  | 115.4 | C4/Z4         |
| N.O.     |      | 935.1386  | 24.6  | Y4            |
| N.O.     |      | 1013.2001 | 14.9  | C5-SO3        |
| N.O.     |      | 1097.4193 | 12.7  | N.A.          |
